# Supplementary material for: Staphylococcus epidermidis Biofilms Have a High Tolerance to Antibiotics in Periprosthetic Joint Infection
Source: PubMed Central journal article supplement (PMC7693748; doi:10.3390/life10110253), 2020-10-24
Supplement: life-10-00253-s001.pdf [file life-10-00253-s001.pdf]

# Supplementary Material of *Staphylococcus epidermidis* Biofilms Have a High Tolerance to Antibiotics in Periprosthetic Joint Infection

**Table S1.** Antibiotic sensitivity of the isolates for each of the antibiotics tested. S = sensitive; R = resistant.

| Isolate    | Type            | Doxycycline | Vancomycin | Daptomycin | Clindamycin | Rifampin | TMP/Sulfa | Nafcillin |
|------------|-----------------|-------------|------------|------------|-------------|----------|-----------|-----------|
| ATCC35984  | Catheter sepsis | S           | S          | S          | S           | S        | S         | S         |
| ATCC12228  |                 | S           | S          | S          | S           | S        | S         | S         |
| Clinical 1 | Sonicate        | S           | S          | S          | S           | S        | S         | S         |
| Clinical 2 | Synovial Fluid  | S           | S          | S          | S           | S        | S         | R         |
| Clinical 3 | Sonicate        | S           | S          | S          | S           | S        | R         | S         |
| Clinical 4 | Synovial Fluid  | S           | S          | S          | R           | R        | R         | R         |
| Clinical 5 | Sonicate        | R           | S          | S          | R           | S        | S         | R         |
| Clinical 6 | Sonicate        | S           | S          | S          | S           | S        | S         | S         |
| Clinical 7 | Sonicate        | S           | S          | S          | S           | S        | R         | R         |
| Clinical 8 | Sonicate        | S           | S          | S          | S           | S        | R         | R         |
| Clinical 9 | Sonicate        | S           | S          | S          | S           | S        | R         | R         |

**Publisher's Note:** MDPI stays neutral with regard to jurisdictional claims in published maps and institutional affiliations.

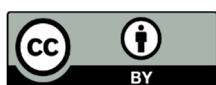

© 2020 by the authors. Licensee MDPI, Basel, Switzerland. This article is an open access article distributed under the terms and conditions of the Creative Commons Attribution (CC BY) license (<http://creativecommons.org/licenses/by/4.0/>).
